# Supplementary material
Source: Springer Nature journal article supplement (https://mijn.bsl.nl/resource/supplementary/13047_2013_574_MOESM3_ESM.pdf/7112490)

Tibial frontal plane motion ( $^{\circ}$ )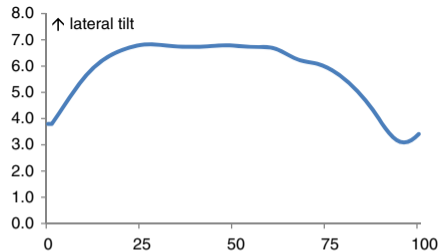Forefoot frontal plane motion ( $^{\circ}$ )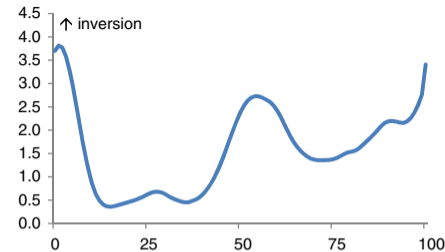Rearfoot frontal plane motion relative to tibia ( $^{\circ}$ )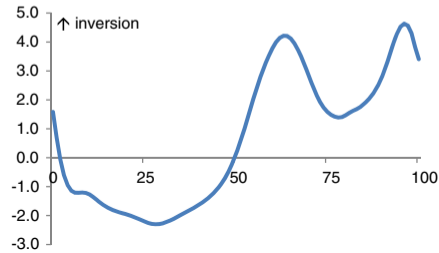Rearfoot frontal plane motion relative to laboratory ( $^{\circ}$ )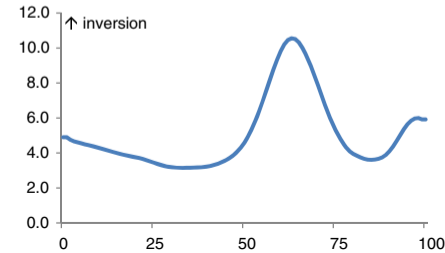

Supplement: MOESM3 [file 7112490]
